# Supplementary material
Source: publisher figshare collection journal article supplement (https://sage.figshare.com/ndownloader/files/24140429)
Supplement: Supplementary file 1 [file 24140429]

*****************************************************************************
*																	        *
* 	  	COMMUNITY COHESION AFTER SYMMETRIC AND ASYMMETRIC CONFLICT	     	*
*								     									    *
*****************************************************************************

* ---> prepares datasets (selection of variables)

*****************************************************************************

global PathData = "[insert your working directory]"


*** personas ***

use ${PathData}RPersonas.dta, clear
keep consecutivo_c consecutivo etnia educ_padre crlider_org1 crlider_org2 crlider_org3 crlider_org4 crlider_org5 lugar_nacimiento
save ${PathData}RPersonas_short.dta, replace

use ${PathData}rpersonas_2013.dta, clear
keep consecutivo llave org_jac org_comunitaria org_sindicato org_agremia org_religiosa org_caridad prestamo_vecino celular_vecinos etnia educ_padre tendencia_pol diria_que_partido nivel_educ sexo edad ahorra hor_actv_ma1 hor_actv_ta1 hor_actv_no1 hor_actv_ma2 hor_actv_ta2 hor_actv_no2 hor_actv_ma3 hor_actv_ta3 hor_actv_no3 hor_actv_ma4 hor_actv_ta4 hor_actv_no4 hor_actv_ma5 hor_actv_ta5 hor_actv_no5 hor_actv_ma6 hor_actv_ta6 hor_actv_no6 hor_actv_ma7 hor_actv_ta7 hor_actv_no7 hor_actv_ma8 hor_actv_ta8 hor_actv_ma9 hor_actv_ta9 hor_actv_ma10 hor_actv_ta10 hor_actv_ma11 hor_actv_ta11 hor_actv_ma12 hor_actv_ta12 min_actv_ma1 min_actv_ta1 min_actv_no1 min_actv_ma2 min_actv_ta2 min_actv_no2 min_actv_ma3 min_actv_ta3 min_actv_no3 min_actv_ma4 min_actv_ta4 min_actv_no4 min_actv_ma5 min_actv_ta5 min_actv_no5 min_actv_ma6 min_actv_ta6 min_actv_no6 min_actv_ma7 min_actv_ta7 min_actv_no7 min_actv_ma8 min_actv_ta8 min_actv_ma9 min_actv_ta9 min_actv_ma10 min_actv_ta10 min_actv_ma11 min_actv_ta11 min_actv_ma12 min_actv_ta12 cr_actv_ma1 cr_actv_ta1 cr_actv_no1 cr_actv_ma2 cr_actv_ta2 cr_actv_no2 cr_actv_ma3 cr_actv_ta3 cr_actv_no3 cr_actv_ma4 cr_actv_ta4 cr_actv_no4 cr_actv_ma5 cr_actv_ta5 cr_actv_no5 cr_actv_ma6 cr_actv_ta6 cr_actv_no6 cr_actv_ma7 cr_actv_ta7 cr_actv_no7 cr_actv_ma8 cr_actv_ta8 cr_actv_ma9 cr_actv_ta9 cr_actv_ma10 cr_actv_ta10 cr_actv_ma11 cr_actv_ta11 cr_actv_ma12 cr_actv_ta12 ayu_lcomunal simpatiza riesgos_org 
save ${PathData}rpersonas_2013_short.dta, replace


*** hogares ***

use ${PathData}rhogar_2013.dta, clear
keep consecutivo_c llave eay_fam_colom eay_famc_vec inf_internet inf_telcelular inf_emisora n_celular n_computadores automoviles motocicletas transporte n_bicicletas n_televisores n_radios n_equipos_video n_aire_acondicionado n_neveras n_hornos n_licuadoras n_lavadoras n_secadoras n_microondas n_duchas n_calentadores n_equipos_sonido 
save ${PathData}rhogar_2013_short.dta, replace


*** comunidades ***

use ${PathData}RComunidades.dta, clear
keep consecutivo_c grarmados_2001 grarmados_2002 grarmados_2003 grarmados_2004 grarmados_2005 grarmados_2006 grarmados_2007 grarmados_2008 grarmados_2009 grarmados_2010 armadoseran_2001 armadoseran_2002 armadoseran_2003 armadoseran_2004 armadoseran_2005 armadoseran_2006 armadoseran_2007 armadoseran_2008 armadoseran_2009 armadoseran_2010 secuestros homicidios amenazas_gra recluta_jovenes_gra quitan_ganado quitan_cosecha exigen_dinero hecho_seguridad seguridad trab_mineria horas_ir_cabecera min_ir_cabecera t_hogares
save ${PathData}RComunidades_short.dta, replace

use ${PathData}rcomunidades_2013.dta, clear
keep consecutivo_c grarmados_2011 grarmados_2012 grarmados_2013 armadoseran_2011 armadoseran_2012 armadoseran_2013 masacres gra_no_denuncia trab_mineria trab_cultili horas_ir_cabecera min_ir_cabecera acceso frecuencia_problema6 frecuencia_problema8 han_ido sexo_lider1 sexo_lider2 sexo_lider3 sexo_lider4 edad_lider1 edad_lider2 edad_lider3 edad_lider4 anos_vive_lider1 anos_vive_lider2 anos_vive_lider3 anos_vive_lider4 educ_lider1 educ_lider2 educ_lider3 educ_lider4 t_hogares
save ${PathData}rcomunidades_2013_short.dta, replace
